# Supplementary material for: New Iridoid Derivatives from the Fruits of Cornus officinalis and Their Neuroprotective Activities
Source: MDPI journal article supplement (doi:10.3390/molecules24030625), 2019-02-11
Supplement: s1 [file s1]

## Supplementary Materials

# New Iridoid Derivatives from the Fruits of *Cornus officinalis* and Their Neuroprotective Activities

Lin-lin Ji<sup>1#</sup>, Xin Wang<sup>1#</sup>, Jin-Jie Li<sup>1</sup>, Xiang-Jian Zhong<sup>1</sup>, Bo Zhang<sup>1</sup>, Jing Juan<sup>1</sup>, Xiao-Ya Shang<sup>1\*</sup>

<sup>1</sup> Beijing Key Laboratory of Bioactive Substances and Functional Foods, Beijing Union University, Beijing 100191, China

\* Correspondence: shangxiaoya@buu.edu.cn; Tel.: +86-010-6200-4533

# These authors contributed equally to this work

Received: date; Accepted: date; Published: date

## Content List

|            |                                                            | Pages |
|------------|------------------------------------------------------------|-------|
| Compound 1 | <sup>1</sup> H NMR spectrum of Compound 1                  | S1    |
|            | <sup>13</sup> C NMR spectrum of Compound 1                 | S2    |
|            | HSQC spectrum of Compound 1                                | S3    |
|            | <sup>1</sup> H- <sup>1</sup> H COSY spectrum of Compound 1 | S4    |
|            | HMBC spectrum of Compound 1                                | S5    |
|            | NOESY spectrum of Compound 1                               | S6    |
|            | HRESIMS spectrum of Compound 1                             | S7    |
|            | IR spectrum of Compound 1                                  | S8    |
|            | UV spectrum of Compound 1                                  | S9    |
|            | CD spectrum of Compound 1                                  | S10   |
| Compound 2 | <sup>1</sup> H NMR spectrum of Compound 2                  | S11   |
|            | <sup>13</sup> C NMR spectrum of Compound 2                 | S12   |
|            | HSQC spectrum of Compound 2                                | S13   |
|            | <sup>1</sup> H- <sup>1</sup> H COSY spectrum of Compound 2 | S14   |
|            | HMBC spectrum of Compound 2                                | S15   |
|            | NOESY spectrum of Compound 2                               | S16   |

|                   |                                                                   |     |
|-------------------|-------------------------------------------------------------------|-----|
|                   | HRESIMS spectrum of Compound <b>2</b>                             | S17 |
|                   | IR spectrum of Compound <b>2</b>                                  | S18 |
|                   | UV spectrum of Compound <b>2</b>                                  | S19 |
|                   | CD spectrum of Compound <b>2</b>                                  | S20 |
| <b>Compound 3</b> | <sup>1</sup> H NMR spectrum of Compound <b>3</b>                  | S21 |
|                   | <sup>13</sup> C NMR spectrum of Compound <b>3</b>                 | S22 |
|                   | HSQC spectrum of Compound <b>3</b>                                | S23 |
|                   | <sup>1</sup> H- <sup>1</sup> H COSY spectrum of Compound <b>3</b> | S24 |
|                   | HMBC spectrum of Compound <b>3</b>                                | S25 |
|                   | NOESY spectrum of Compound <b>3</b>                               | S26 |
|                   | HRESIMS spectrum of Compound <b>3</b>                             | S27 |
|                   | IR spectrum of Compound <b>3</b>                                  | S28 |
|                   | UV spectrum of Compound <b>3</b>                                  | S29 |
|                   | CD spectrum of Compound <b>3</b>                                  | S30 |

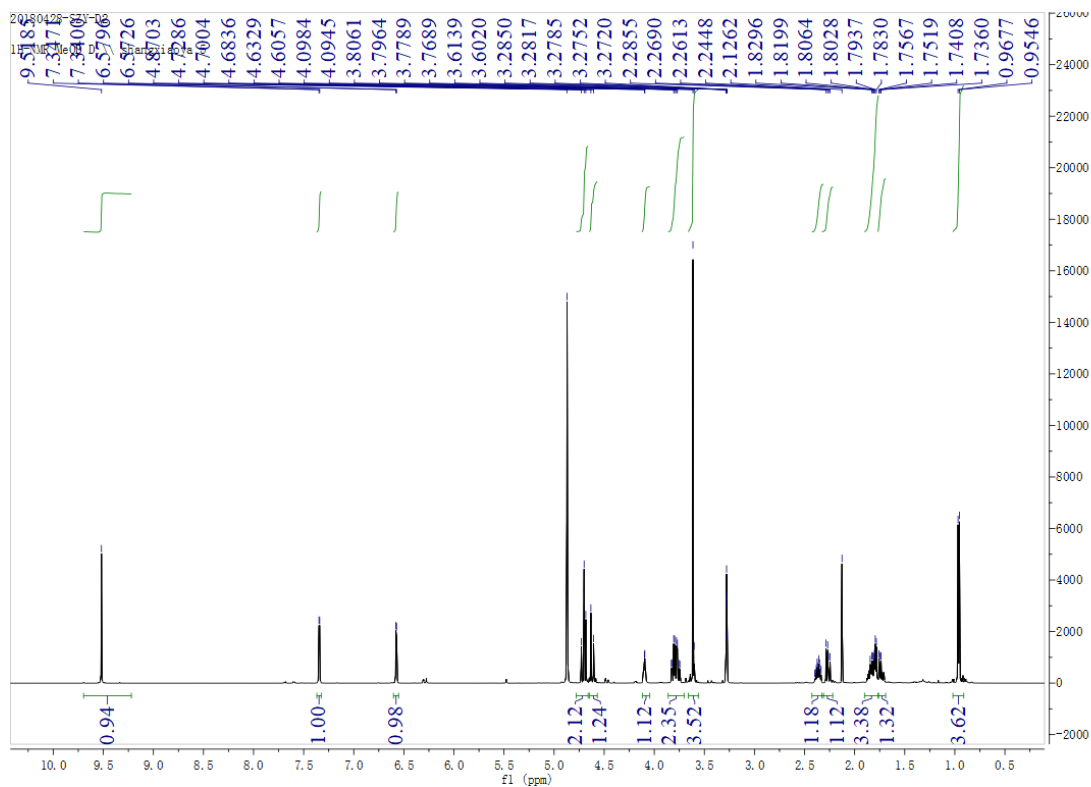

S1  $^1\text{H}$  NMR spectrum of Compound 1

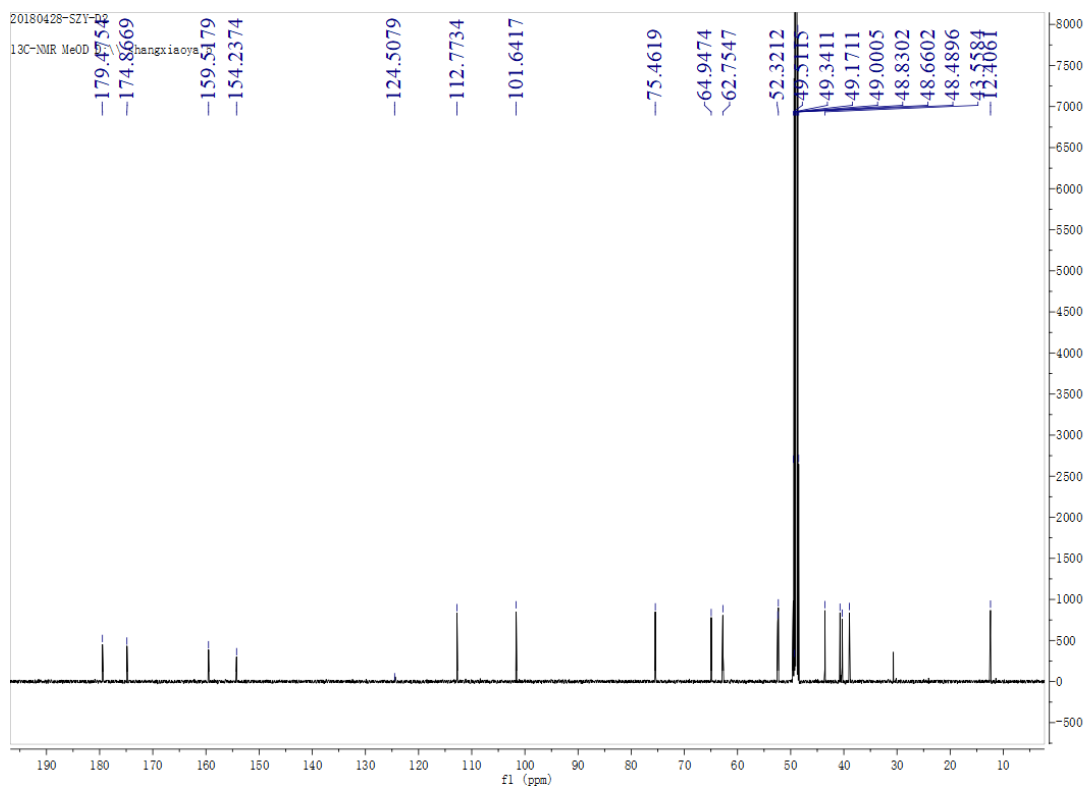

S2  $^{13}\text{C}$  NMR spectrum of Compound **1**

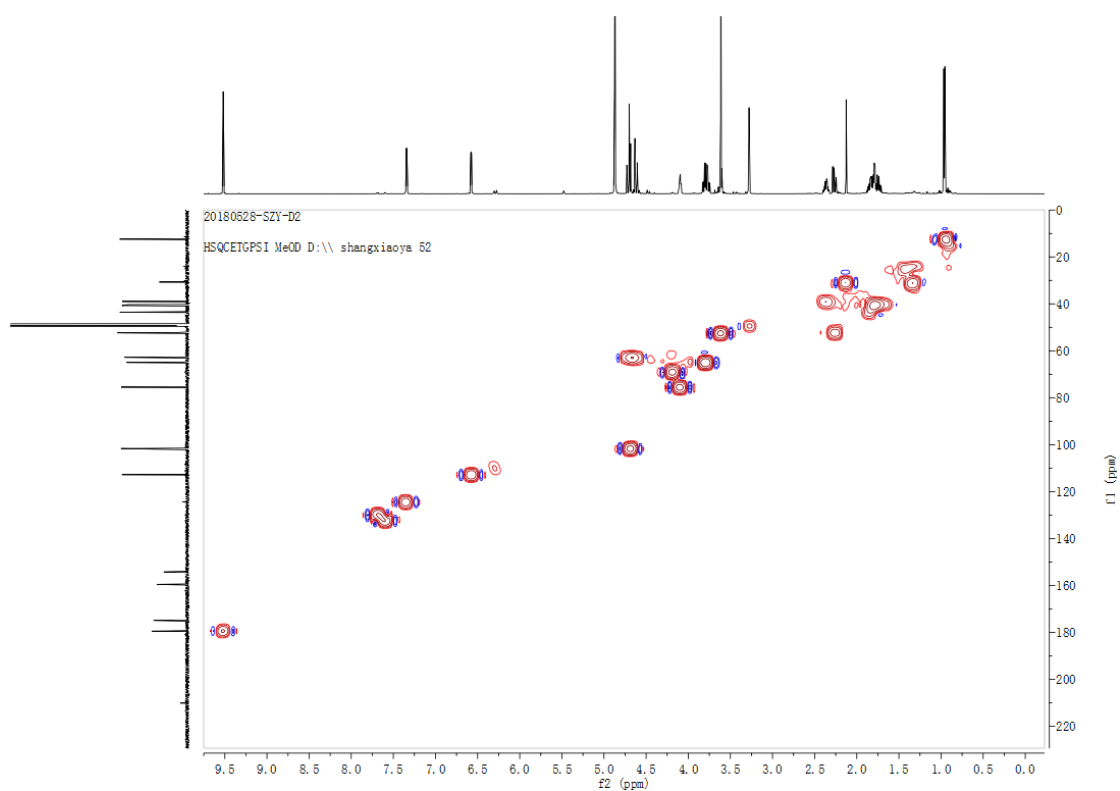

S3 HSQC spectrum of Compound **1**

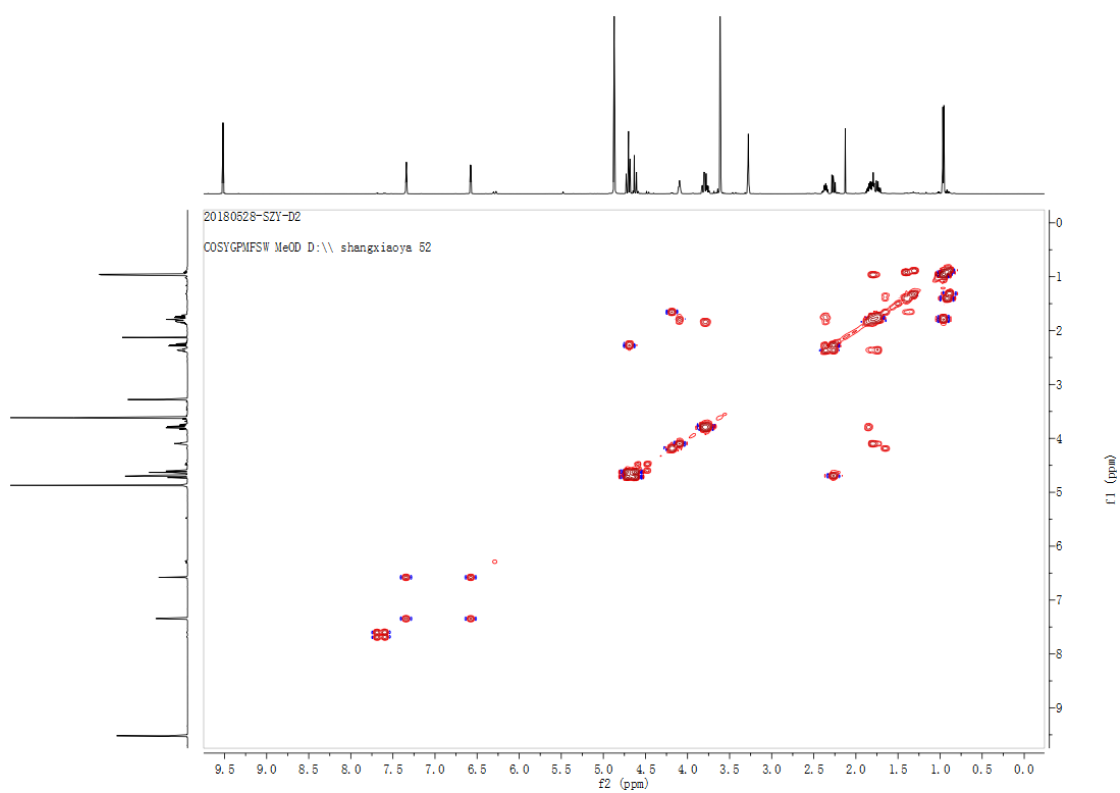

S4  $^1\text{H}$ - $^1\text{H}$  COSY spectrum of Compound **1**

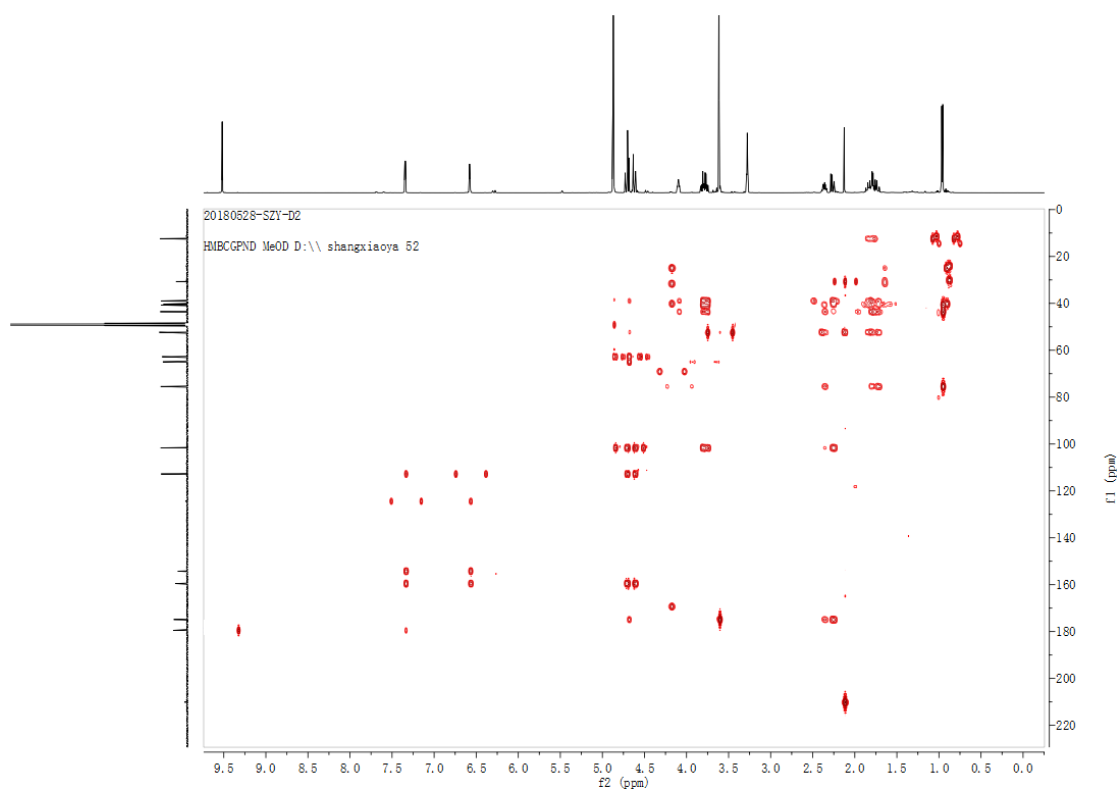

S5 HMBC spectrum of Compound **1**

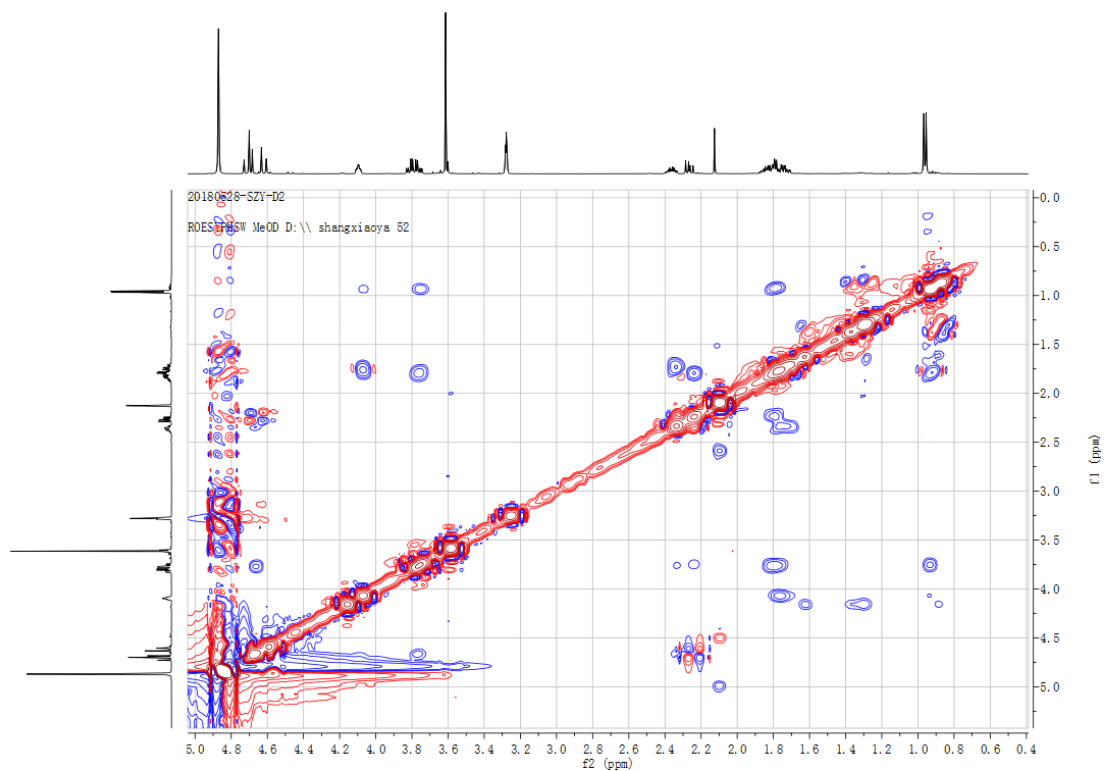

S6 NOESY spectrum of Compound **1**

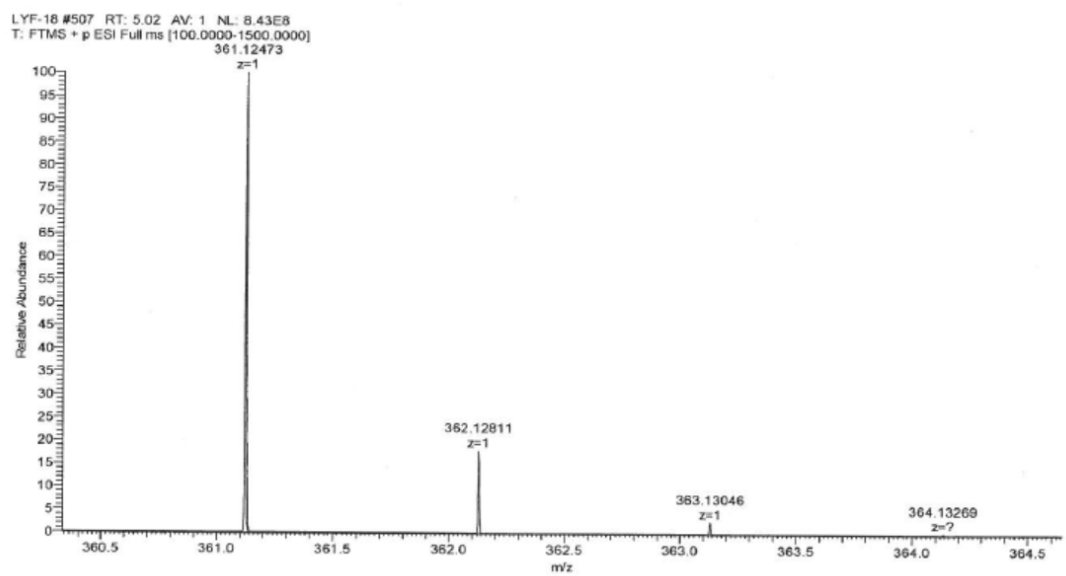

| m/z       | Theo. Mass | Delta (ppm) | RDB equiv. | Composition   |      |
|-----------|------------|-------------|------------|---------------|------|
| 361.12473 | 361.12577  | -2.89       | 6.5        | C17 H22 O7 Na | M+Na |

S7 HRESIMS spectrum of Compound **1**

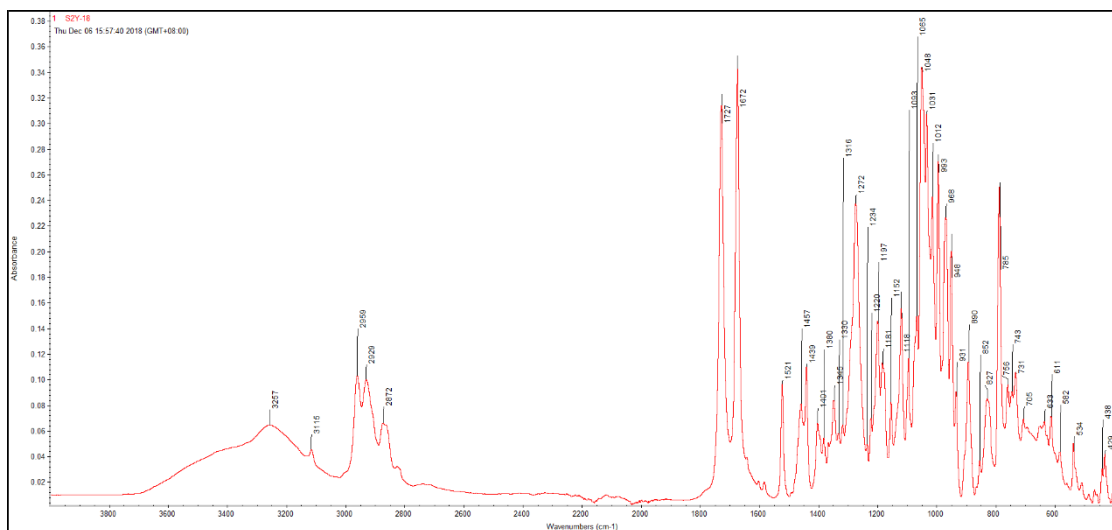

S8 IR spectrum of Compound **1**

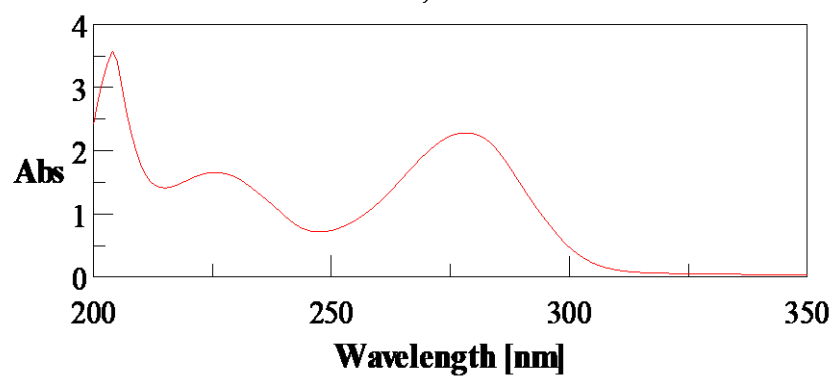

S9 UV spectrum of Compound 1

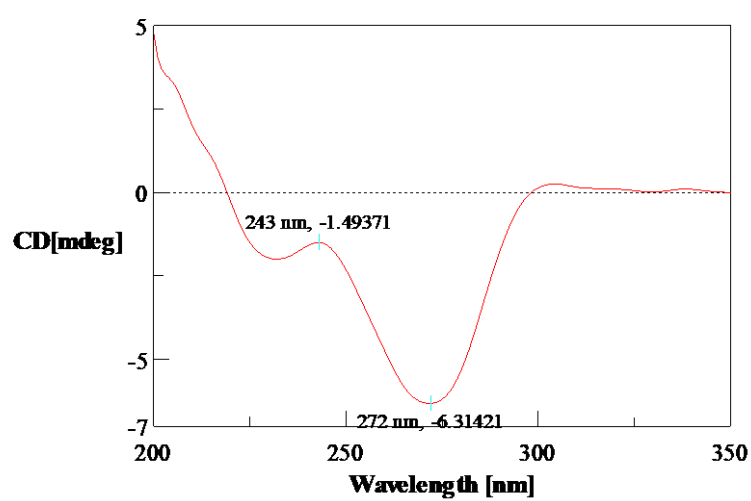

S10 CD spectrum of Compound 1

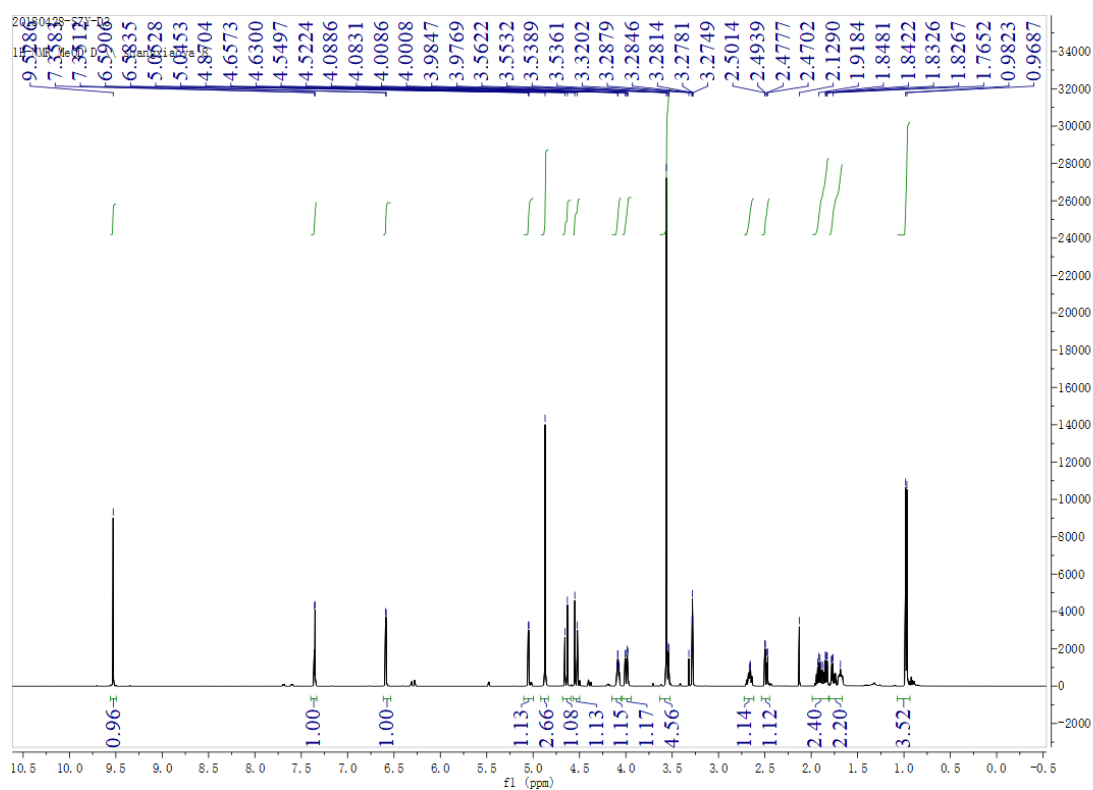

S11 <sup>1</sup>H NMR spectrum of Compound **2**

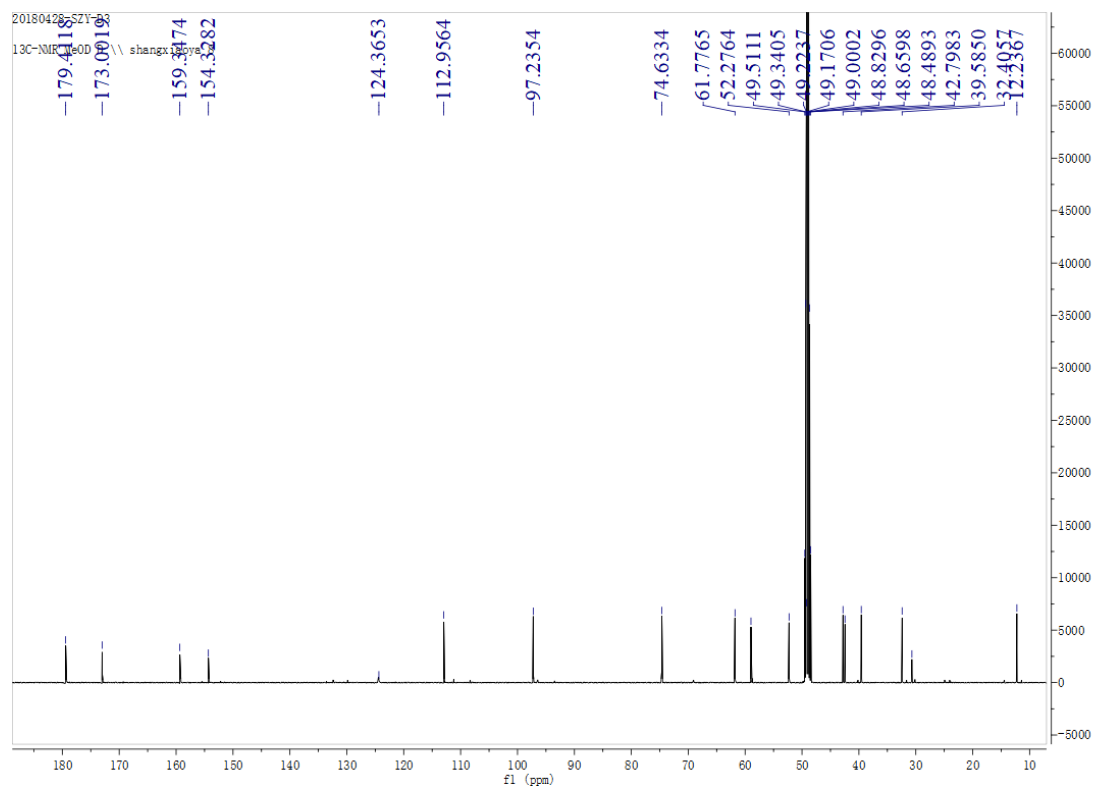

S12 <sup>13</sup>C NMR spectrum of Compound **2**



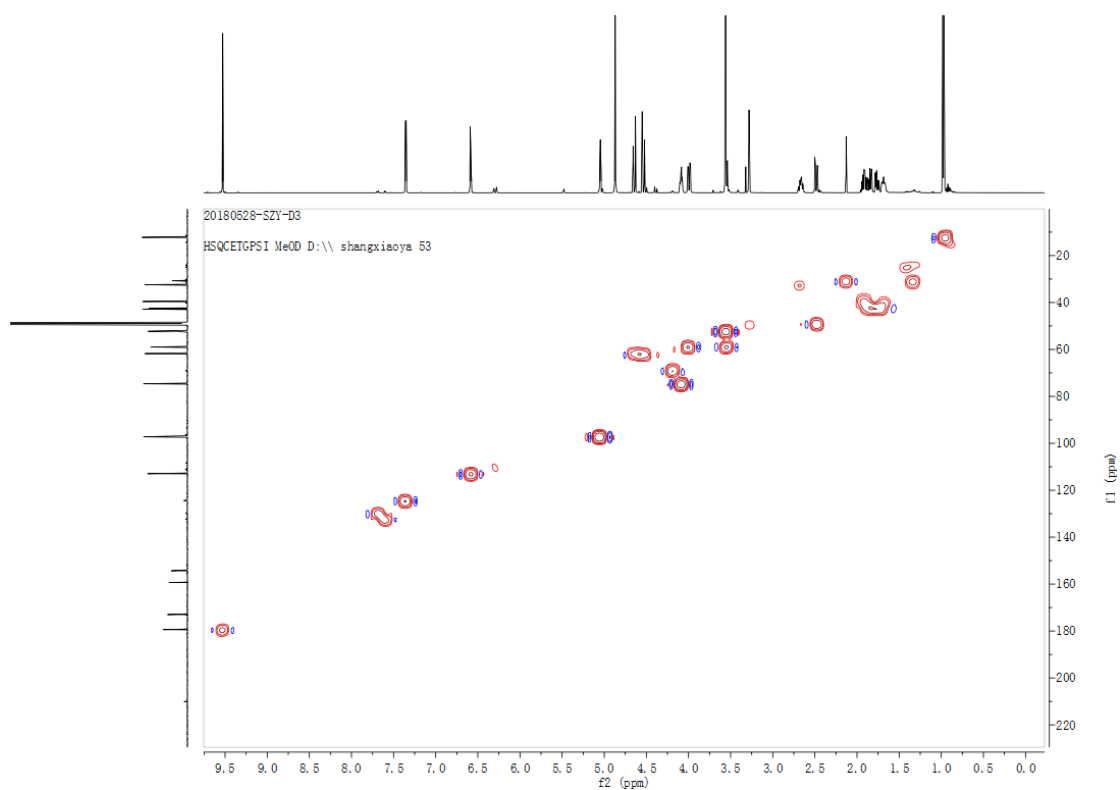

S13 HSQC spectrum of Compound **2**

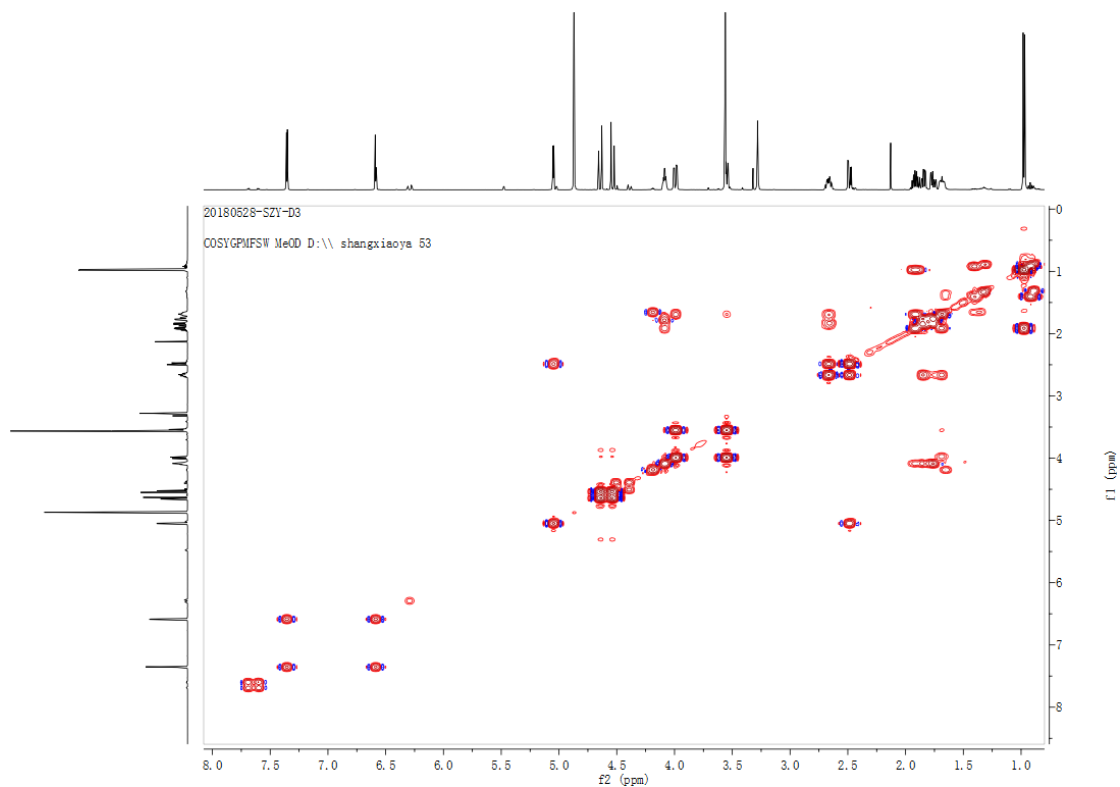

S14  $^1\text{H}$ - $^1\text{H}$  COSY spectrum of Compound **2**

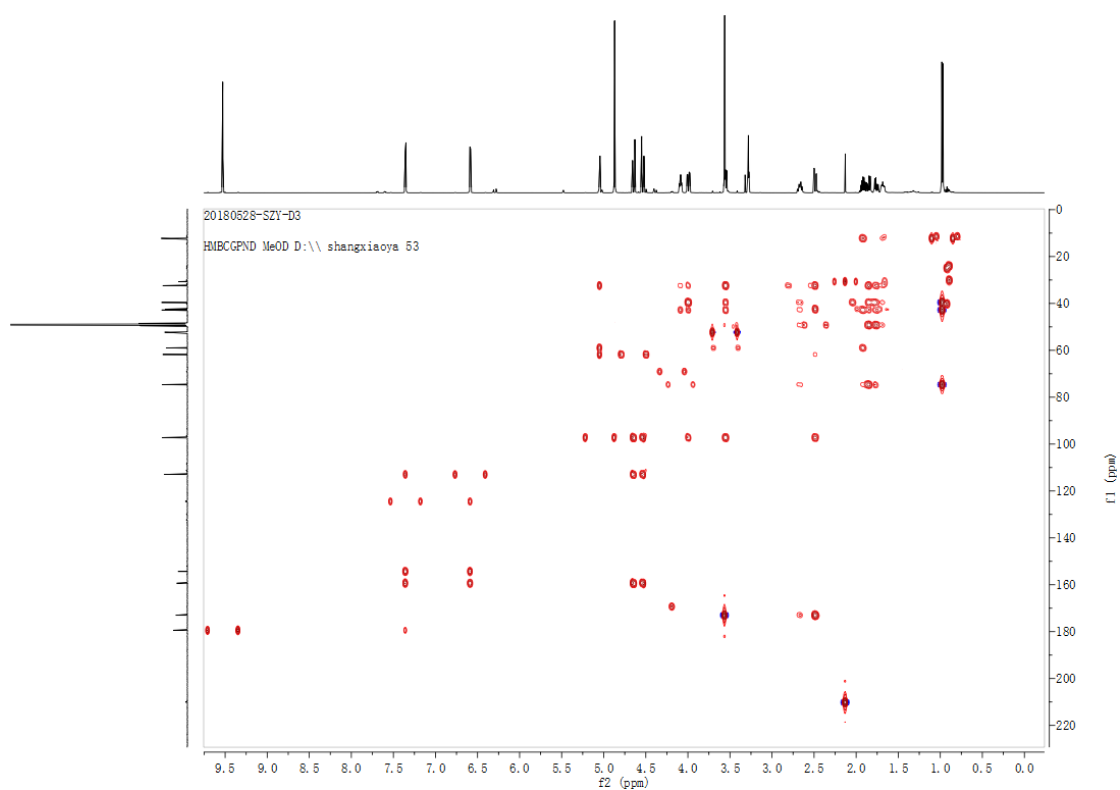

S15 HMBC spectrum of Compound 2

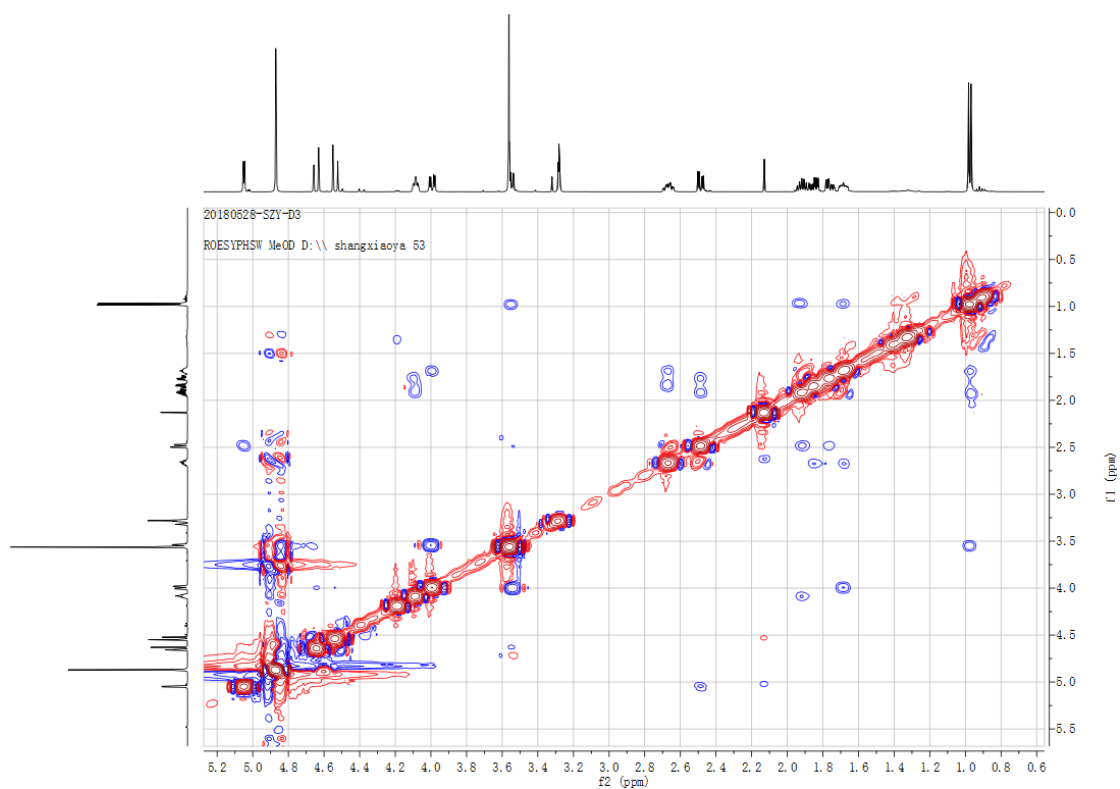

S16 NOESY spectrum of Compound 2

LYF-19 #519 RT: 5.13 AV: 1 NL: 1.24E9  
T: FTMS + p ESI Full ms [100.0000-1500.0000]

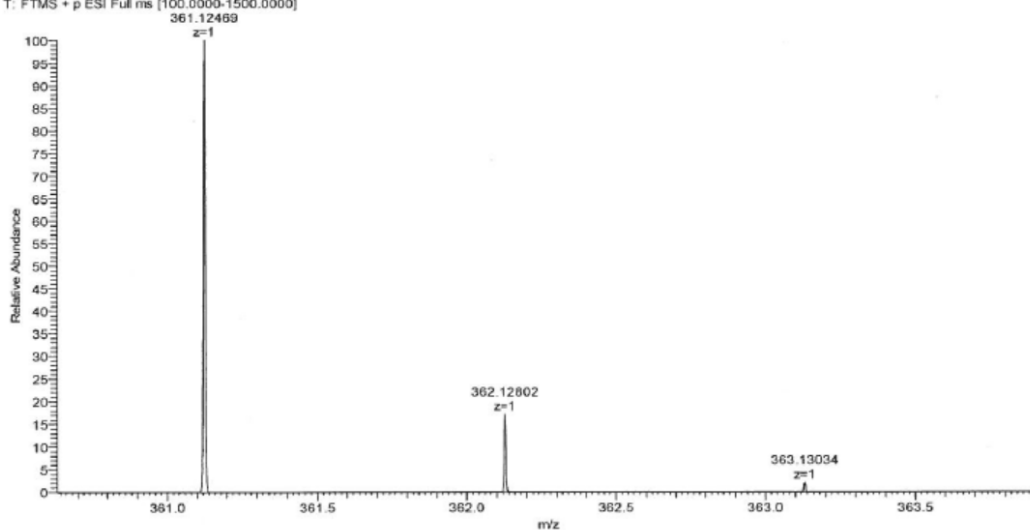

| m/z       | Theo. Mass | Delta (ppm) | RDB equiv. | Composition   |      |
|-----------|------------|-------------|------------|---------------|------|
| 361.12469 | 361.12577  | -3          | 6.5        | C17 H22 O7 Na | M+Na |

S17 HRESIMS spectrum of Compound 2

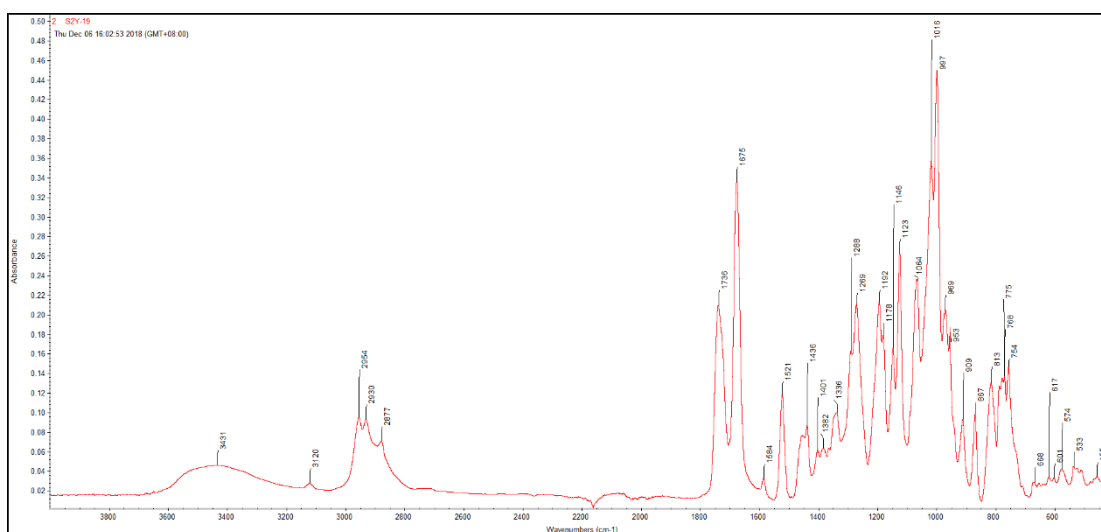

S18 IR spectrum of Compound 2

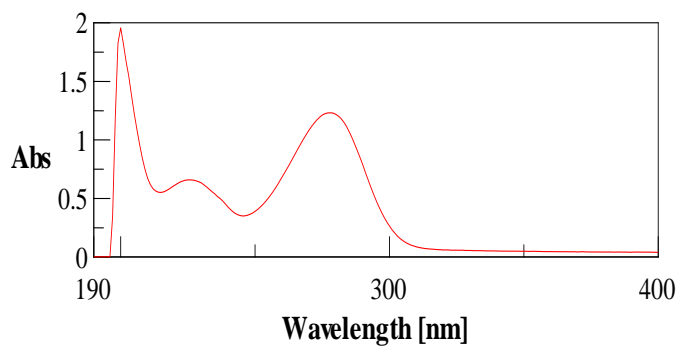

S19 UV spectrum of Compound 2

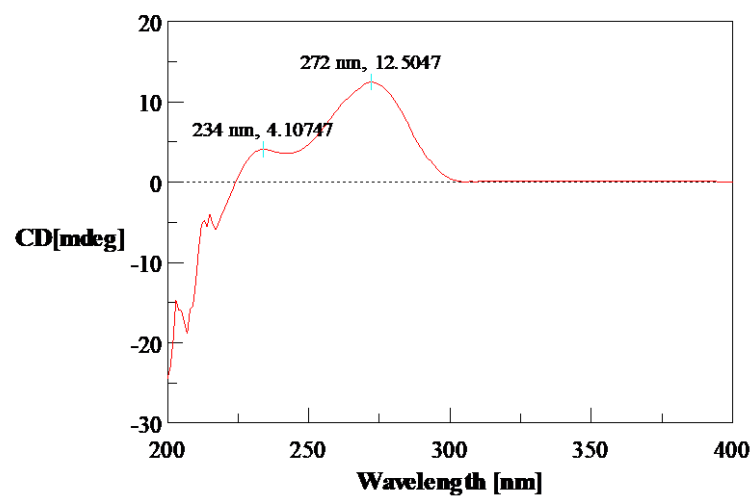

S20 CD spectrum of Compound 2

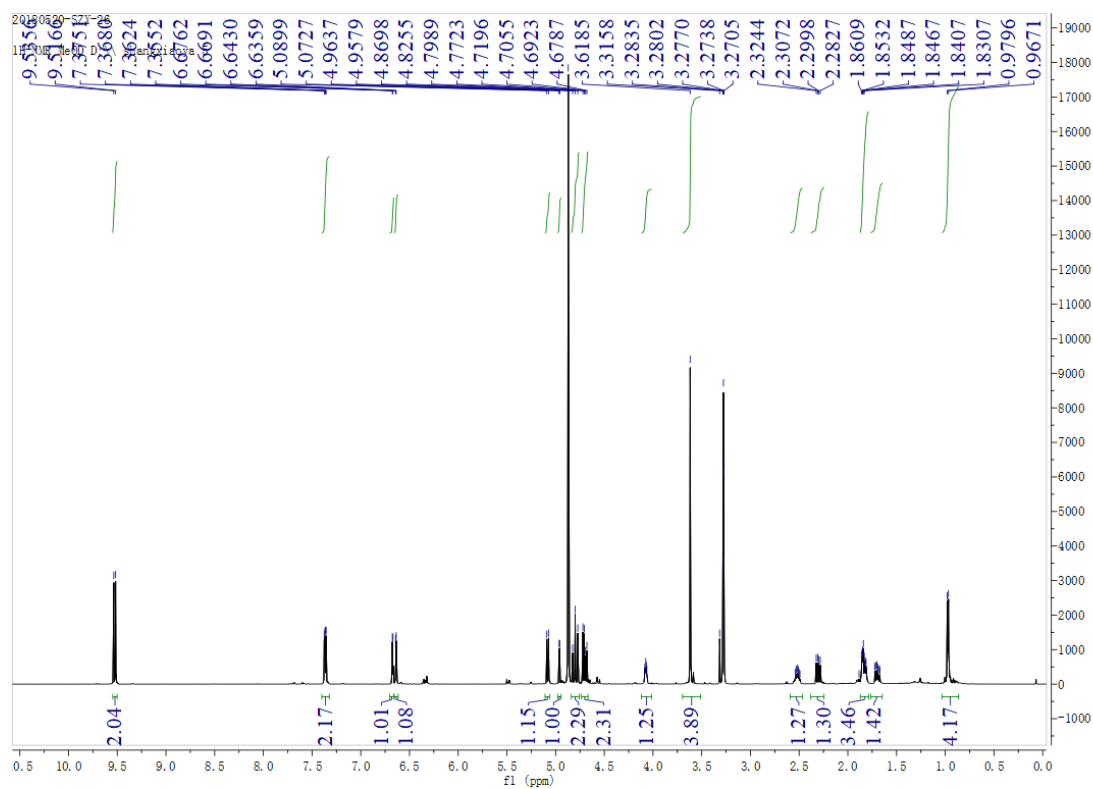

S21  $^1\text{H}$  NMR spectrum of Compound 3

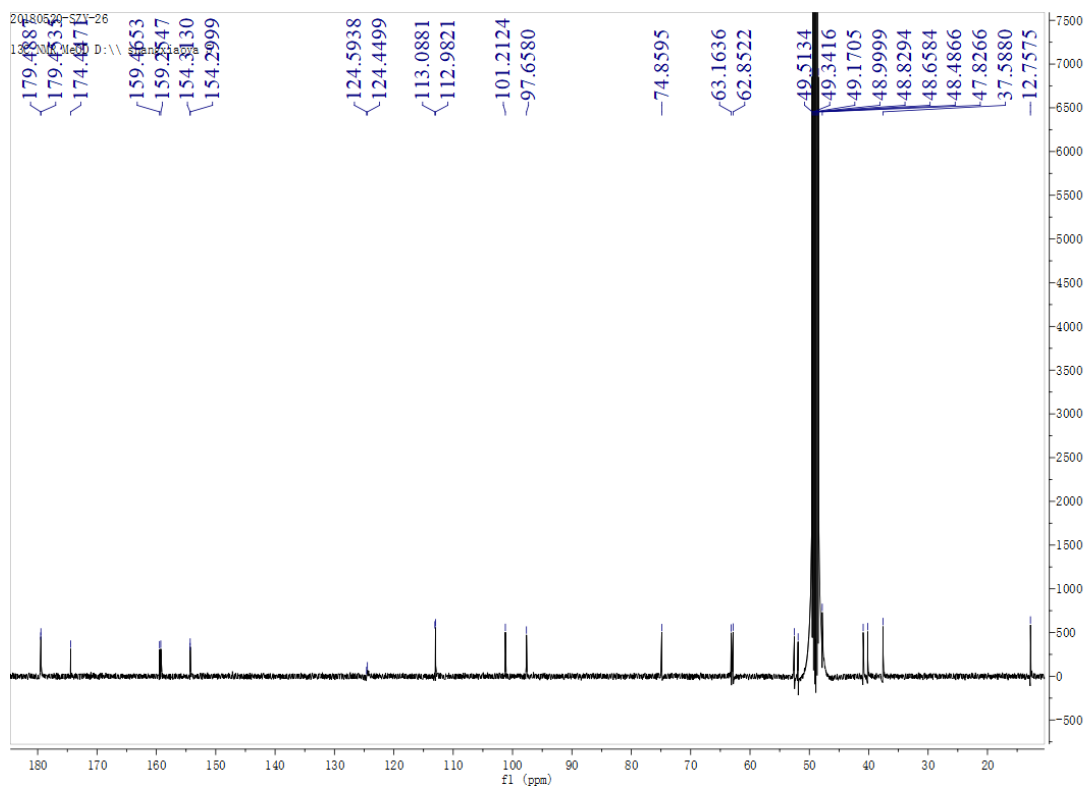

S22  $^{13}\text{C}$  NMR spectrum of Compound **3**

S23 HSQC spectrum of Compound **3**

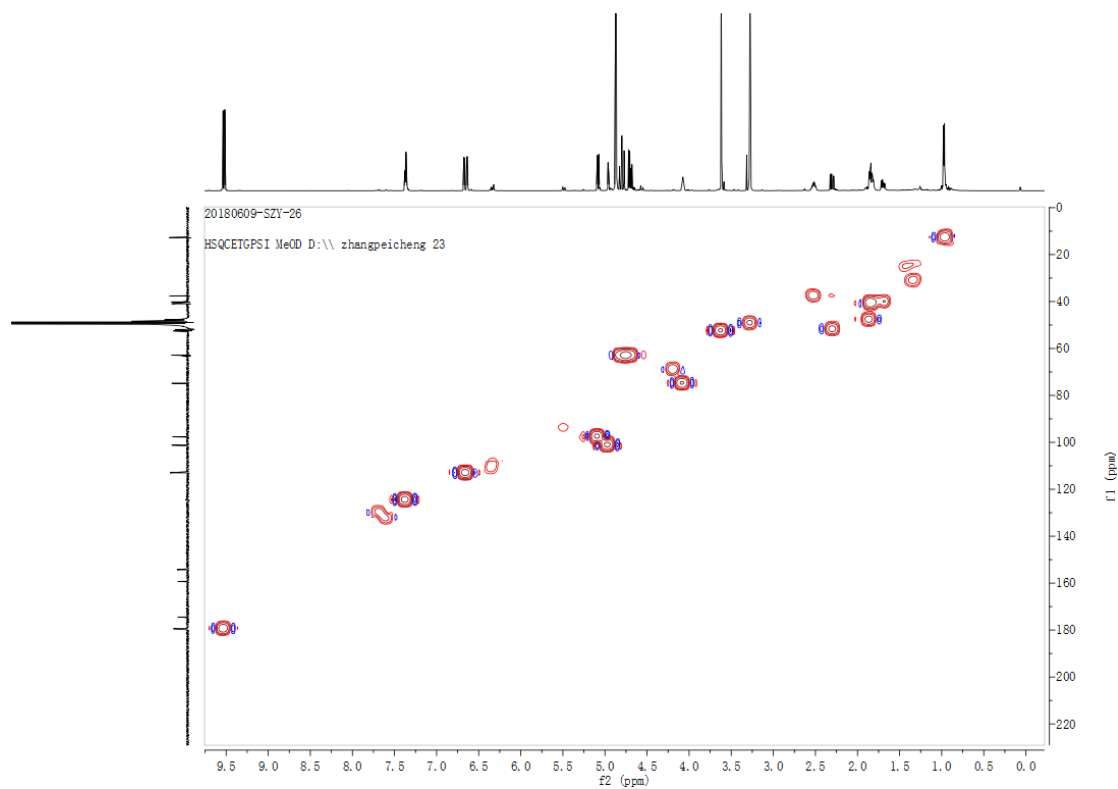

S24  $^1\text{H}$ - $^1\text{H}$  COSY spectrum of Compound **3**

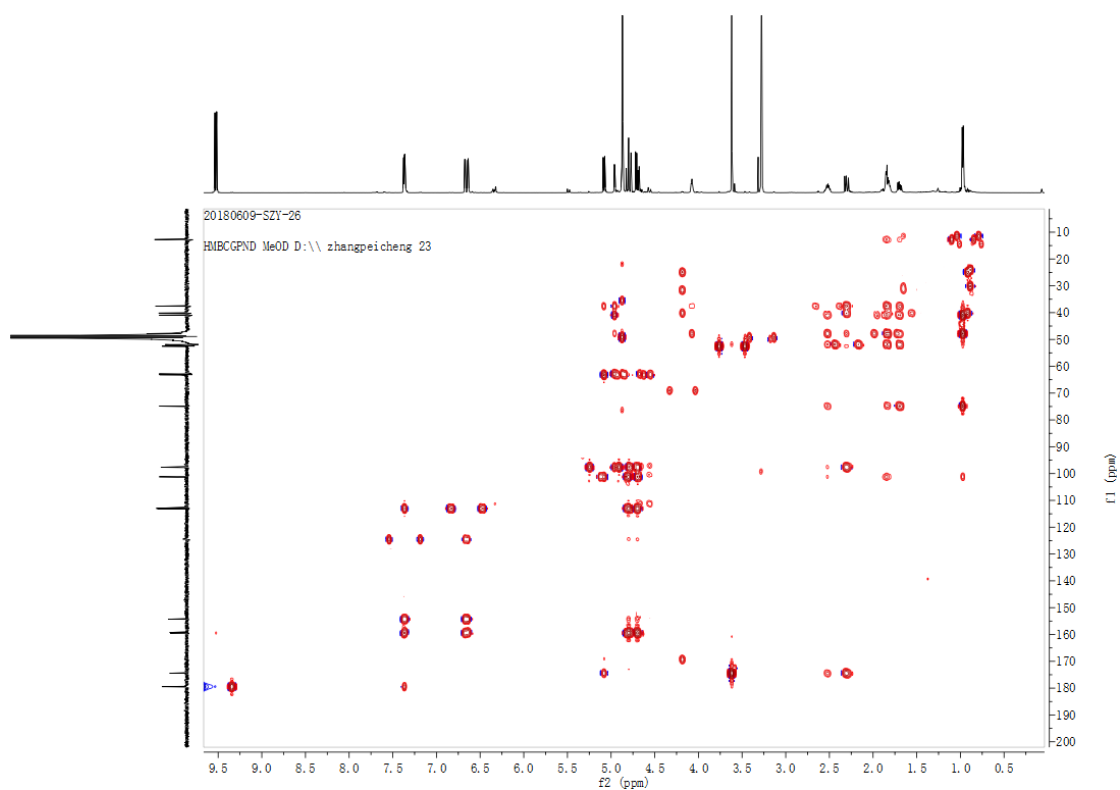

S25 HMBC spectrum of Compound **3**

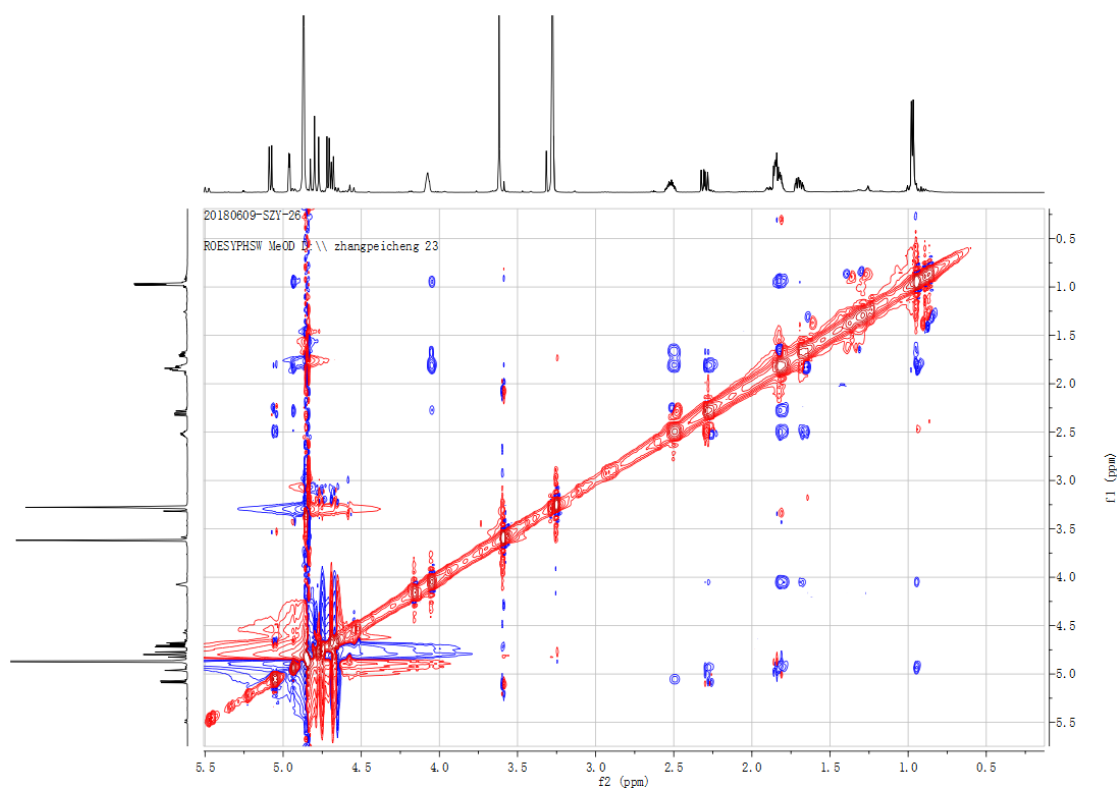

S26 NOESY spectrum of Compound **3**

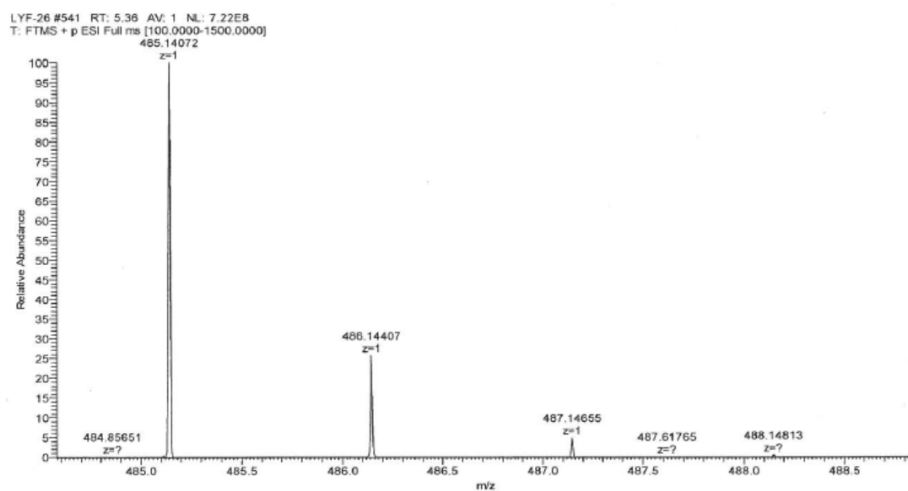

| m/z       | Theo. Mass | Delta (ppm) | RDB equiv. | Composition    |      |
|-----------|------------|-------------|------------|----------------|------|
| 485.14072 | 485.14182  | -2.26       | 10.5       | C23 H26 O10 Na | M+Na |

S27 HRESIMS spectrum of Compound **3**

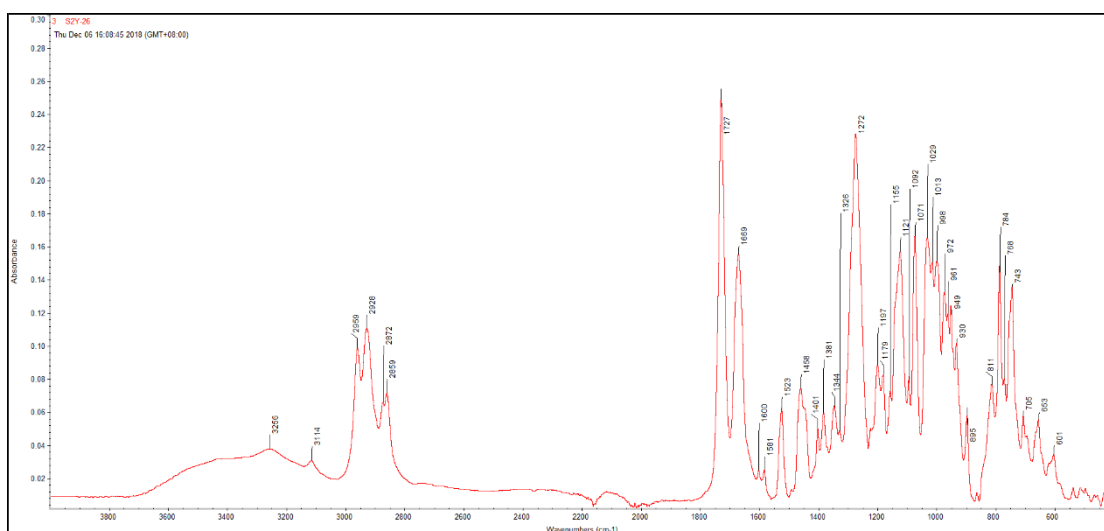

S28 IR spectrum of Compound **3**

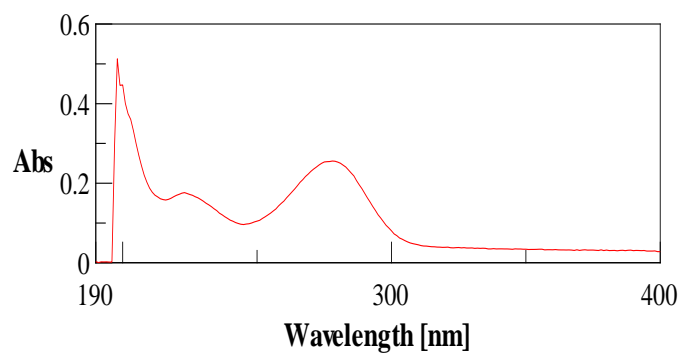

S29 UV spectrum of Compound **3**

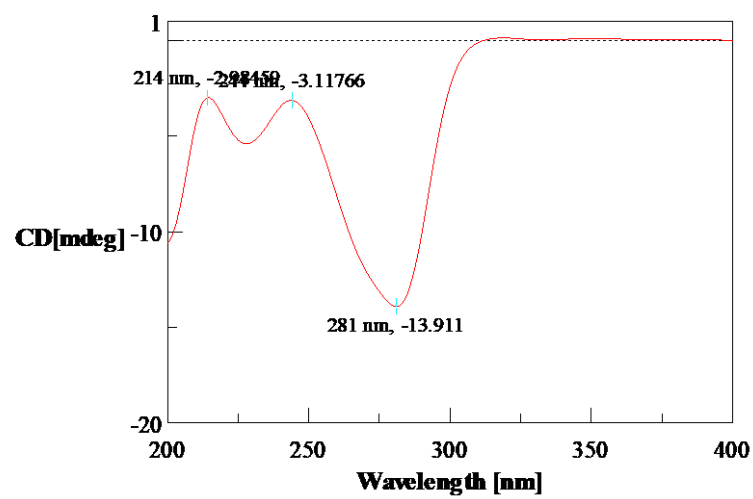

S30 CD spectrum of Compound 3
